# Supplementary material
Source: PubMed Central journal article supplement (PMC3508785)
Supplement: NIHMS420689-supplement-supplement_1.pdf [file NIHMS420689-supplement-supplement_1.pdf]

Supplemental information for “Interplay of Ca<sup>2+</sup> and cAMP signaling in the insulin-secreting MIN6  $\beta$ -cell line” by Landa *et al.*

**Figure S1. Expression of adenylate cyclase and phosphodiesterase isoforms in MIN6 cells.** PCR amplification of (A) AC and (B) PDE isoforms cDNA reverse transcribed from MIN6 cell total RNA. The polymerase chain reaction was performed as described in *Experimental Procedures* using corresponding primer pairs (see Supplemental Table 1). Data are representative of four independent experiments.

**FIGURE S1**

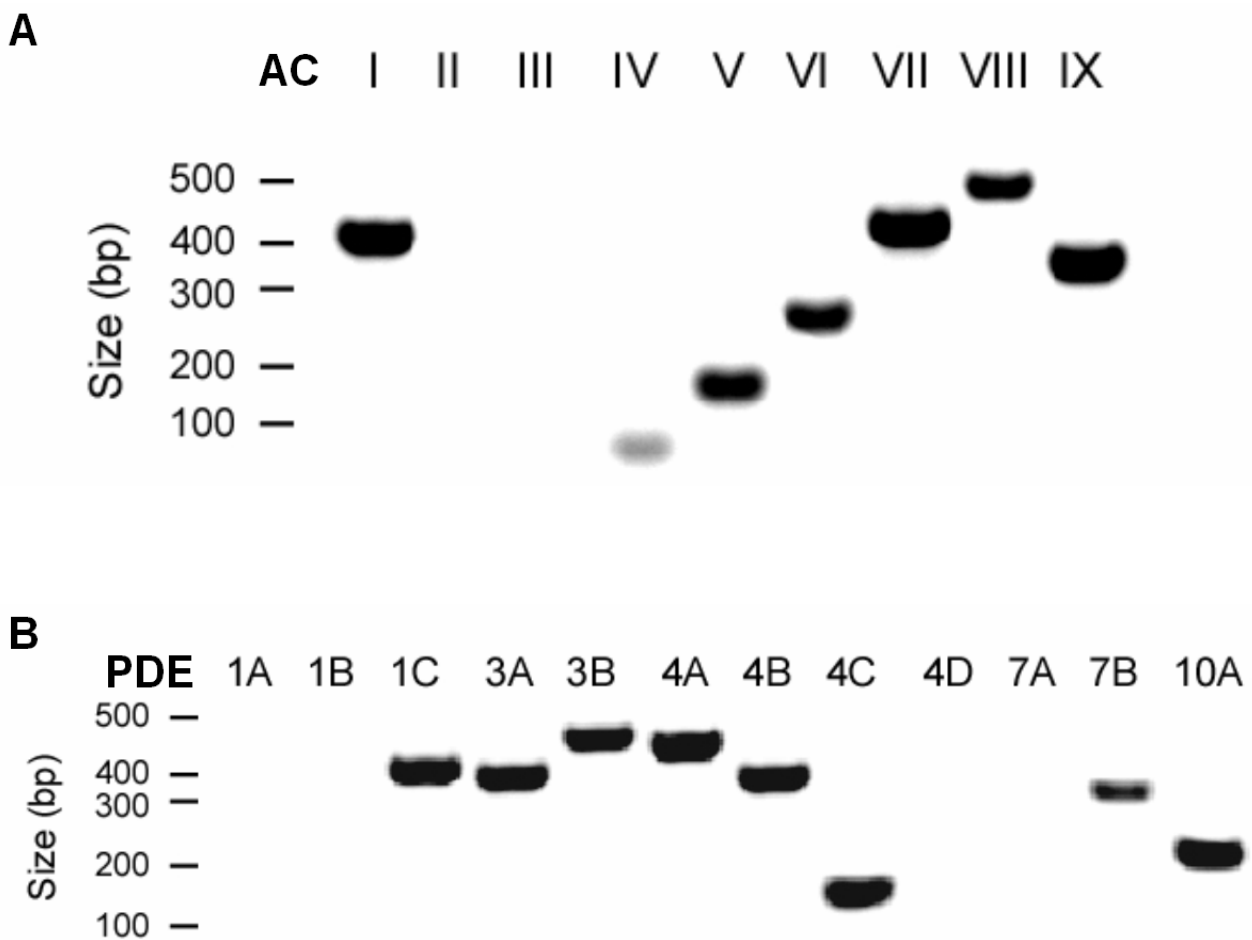

**Supplemental Table 1. Oligonucleotide Sequences for RT-PCR Analysis of Adenylate Cyclase and Phosphodiesterase Isoform Expression.** The forward and reverse primer sequences, and predicted amplicon size for each PCR product is listed.

| <u>Gene</u>    | <u>Accession Number</u> | <u>Primers 5' → 3'</u>                             | <u>Amplicon Size (bp)</u> |
|----------------|-------------------------|----------------------------------------------------|---------------------------|
| <b>AC-I</b>    | BC_050125               | AGGCCACTGAGGAGGGTAGAG<br>TGGGCGTGCGTGACATC         | 405                       |
| <b>AC-II</b>   | NM_153534               | TTCCTGACAAGAAGCGTGTG<br>GACTAGGGATGCGGTTACGA       | 368                       |
| <b>AC-III</b>  | NM_138305               | GGGGAGCTTCTGACCTTTTT<br>TCCCAAAGCTTTTCACTGCT       | 172                       |
| <b>AC-IV</b>   | NM_080435               | TCCTGAACACAGACCTGACG<br>GAGCTCAGGTGCCTAGGATG       | 59                        |
| <b>AC-V</b>    | BC_090846               | GGTAGGCAAGCTCAAAGCTG<br>TTCCCTTACAGGGCATTGTC       | 175                       |
| <b>AC-VI</b>   | NM_007405               | TAGCTGGTGCCTTGGTTTCT<br>TCTTCCTCTCCTCTGCCTTG       | 274                       |
| <b>AC-VII</b>  | NM_007406               | GCAAGTCTTTTGGGACAAGG<br>CGGAATGCTCTGGAGCTAAG       | 429                       |
| <b>AC-VIII</b> | NM_009623               | CTGCGCTTGCTGAATGAGAT<br>TCGTCCCAGGAGAAAGTATGTT     | 498                       |
| <b>AC-IX</b>   | NM_009624               | CGGTCTCCCACAGATGAGAT<br>TCTGGGGACAGAACTGAGG        | 351                       |
| <b>PDE1A</b>   | NM_016744               | GCTCCTCTCATGGCGTAGAC<br>AAGAAAAGGGAGGGAGGTGA       | 243                       |
| <b>PDE1B</b>   | NM_008800               | AGAGGAGCCATTGGGATTCT<br>CACCTGGACTTGGCCTTAAA       | 480                       |
| <b>PDE1C</b>   | NM_011054               | ACAGGGCAGAGGAGATCAAGTTT<br>CTTTTCGCCTGCCTTTTCTCCTT | 410                       |
| <b>PDE3A</b>   | NM_018779               | CCATTTGCCAATCTTCTGGT<br>GAGGACGAAGCCTGTGAAAG       | 385                       |
| <b>PDE3B</b>   | NM_011055               | TTTTGCCAACTAATGCACCA<br>CCAGCAAAGCAGCATTATGA       | 457                       |
| <b>PDE4A</b>   | NM_019798               | AGCCATGGAACAGTCAAAGGTCAA<br>TCAGGAGGGCCAGGAGTCGT   | 438                       |
| <b>PDE4B</b>   | NM_019840               | CCACAGCTATTTTCAGCAGCA<br>TGATGGGAACTGGCCTCTAC      | 362                       |
| <b>PDE4C</b>   | NM_201607               | GTCCAGCTGCAAGCCTTTAC<br>GCCTGCAGTGGTCTTCTAGG       | 167                       |
| <b>PDE4D</b>   | NM_011056               | GGAGGACAATCGTGAGTGGT<br>TGAGTCTTGGGTGCACAGAG       | 217                       |
| <b>PDE7A</b>   | NM_008802               | TCCATGTGGGAAAGGCTTAG<br>TCGCCAAAGGGTAATGTTTC       | 228                       |
| <b>PDE7B</b>   | NM_013875               | ATGGAAACTGCCAATGCTTC<br>CACCCACTTCGCAAATTCTT       | 323                       |
| <b>PDE10A</b>  | NM_011866               | GTGAAAACCCCTGTCAGAA<br>GATGCAGGCAAGAACCTCTC        | 220                       |
